# Supplementary material for: Novel highly active FSM-16 supported molybdenum catalyst for hydrotreatment
Source: Royal Society of Chemistry journal article supplement (doi:10.1039/b809808e), 2008-01-01
Supplement: b809808e.pdf [file b809808e.pdf]

| Elmt  | Spect. | Element | Atomic |
|-------|--------|---------|--------|
|       | Type   | %       | %      |
| O K   | ED     | 57.56   | 70.42  |
| Na K  | ED     | 0.10*   | 0.08*  |
| Al K  | ED     | 0.23    | 0.17   |
| Si K  | ED     | 42.05   | 29.31  |
| Fe K  | ED     | 0.06*   | 0.02*  |
| Total |        | 100.00  | 100.00 |

EDAX analysis of FSM-16
